# Supplementary material
Source: Springer Nature journal article supplement (https://www.springermedizin.de/resource/supplementary/12943_2009_565_MOESM5_ESM.pdf/9554982)
Supplement: MOESM5 [file 9554982]

## (A) Amino acid sequence of human ZAR2 protein

MERFVRVPYGLYQGYGSTVPLGQPGLSGHKQPD  
WRQNMGPPTFLARPGLLVPANAPDYCIDPYKRA  
QLKAILSQMNPSLSPRLCKPNTKEVGVQVSPRV  
DKAVQCSLGPRTLSSCSPWDGRDPQEPLPACGV  
TSPATGRRGLIRLRDGDDEASKALPGPAEASQ  
PQPPSRRSGADRQEEPGQLEESGEKDAPCPQET  
KSKQVPGDAASEPLRRPNFQFLEPKYGYFHCKD  
CKTRWESAYVWCISG<sup>1</sup>TNKVYFKQLCCKCQKSFN  
PYRVEAIQCQTC<sup>2</sup>SKSHCSC<sup>3</sup>PQKKRHI<sup>4</sup>DLRRPHR  
QELCGRCKDKRF<sup>5</sup>SCGNIYSFKYVM

## (B) Alignment between ZAR1 and ZAR2 protein amino acid sequences

|       |                                                                                                                       |     |
|-------|-----------------------------------------------------------------------------------------------------------------------|-----|
| hZar1 | MAALGDEVLDGYVFPACPPCSYRYPYPAATKKGGAAGGSWQQRGRGCLPASSECSAGAAS                                                          | 60  |
| hZar2 | -----MERFVRVPYGLYQGYGSTVPLGQPGLSGHKQPDWR--QNMGPPTFLARP                                                                | 48  |
| hZar1 | LSFPFGCRLTAAEYFDSYQERELMALLAQVGPGLGPRARRAGSCDVAVQVSPRIDAAVQC                                                          | 120 |
| hZar2 | LLVEAN---APDYCIDPYKRAQLKAILSQMNPSLSPRLCKPNTKEVGVQVSPRVDKAVQC                                                          | 105 |
| hZar1 | SLGRRTLQRRARDPESPAFGAEGTTGGGSFSQQPSRRGLEQGSFQNGAPRPMRFPRTV                                                            | 180 |
| hZar2 | SLGPRTLSSCSPWDGRDPQEPLPACGV-----SCSPWDGRDPQEPLP-ACG                                                                   | 131 |
| hZar1 | VYSPLALRRLTAFLEGPSPAAGEQRSGASDGERGPPPARLQGPPEEGEVWTKKAFRRPQSD                                                         | 240 |
| hZar2 | VTSPATGRRGLIRLRDGDDEASKALPGPAEASQPPQ-----PSRRSGA                                                                      | 175 |
| hZar1 | DDGEAQAAVRASWEQPADGPELPPREAQEGEAAPRSALRSFGQPPSAGRARDGGDGREAA                                                          | 300 |
| hZar2 | DRQEEPGQLEESGEKDAPCPQETKSKQVPGDAASEPLRRP-----                                                                         | 215 |
|       | Zinc Finger #1                                                                                                        |     |
| hZar1 | VAGEGSPSRPELGKERLRFQFLEQKYGYHCKDCNIRWESAYVWCVQGTNKVYFKQFCR                                                            | 360 |
| hZar2 | -----NFQFLEPKYGYFHCKDCKTRWESAYVWCISG <sup>1</sup> TNKVYFKQLC                                                          | 257 |
|       | Zinc Finger #2                                                                                                        |     |
| hZar1 | TCQKSYNPFYRVEDITCQSCQKQTRCSCPVKLRHVDPKRPHRQDLCGRC <sup>6</sup> KGKRLSCDSTFSF                                          | 420 |
| hZar2 | KCQKSFNPFYRVEAIQCQTC <sup>2</sup> SKSHCSC <sup>3</sup> PQKKRHI <sup>4</sup> DLRRPHRQELCGRCKDKRF <sup>5</sup> SCGNIYSF | 317 |
| hZar1 | KYII 424                                                                                                              |     |
| hZar2 | KYVM 321                                                                                                              |     |
